# Supplementary material
Source: publisher site journal article supplement (https://www.dovepress.com/article/432268)
Supplement: Supplementary file 1 [file get_supplementary_file.php]

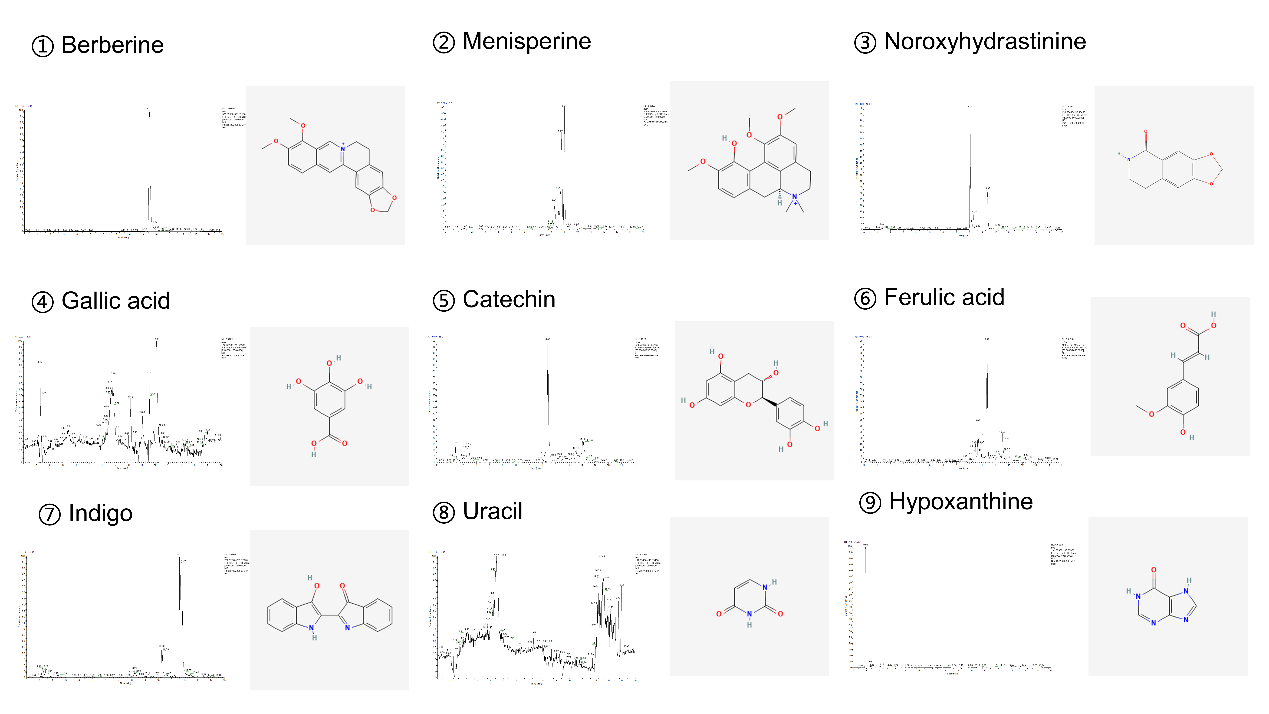


**Supplementary Figure1.The extracted ion chromatography (EIC) and chemical structure from PubChem database of representative compounds in BYD.**

**Supplementary Table 1.**

**In line with OB ≥ 30% and DL ≥ 0.18, 41** **bioactive ingredients of BYD were screened using TCMSP database.**

| **MOL ID** | **Molecule name** | **MW** | **AlogP** | **Hdon** | **Hacc** | **OB (%)** | **Caco-2** | **BBB** | **DL** | **FASA-** | **HL** |
| --- | --- | --- | --- | --- | --- | --- | --- | --- | --- | --- | --- |
| MOL001454* | Berberine | 336.39 | 3.45 | 0 | 4 | 36.86 | 1.24 | 0.57 | 0.78 | 0.19 | 6.57 |
| MOL001458* | Coptisine | 320.34 | 3.25 | 0 | 4 | 30.67 | 1.21 | 0.32 | 0.86 | 0.26 | 9.33 |
| MOL002641* | Phellavin_qt | 374.42 | 2.51 | 5 | 7 | 35.86 | -0.41 | -1.32 | 0.44 | 0.33 | 15.81 |
| MOL002643* | Delta7-stigmastenol | 414.79 | 8.08 | 1 | 1 | 37.42 | 1.3 | 0.83 | 0.75 | 0.22 | 5.27 |
| MOL002644* | Phellopterin | 300.33 | 3.64 | 0 | 5 | 40.19 | 0.98 | 0.48 | 0.28 | 0.24 | -1.64 |
| MOL002651* | Dehydrotanshinone II A | 292.35 | 4.22 | 0 | 3 | 43.76 | 1.02 | 0.52 | 0.4 | 0.33 | 23.71 |
| MOL002662* | Rutaecarpine | 287.34 | 3.36 | 1 | 3 | 40.3 | 1.13 | 0.71 | 0.6 | 0.33 | 8.21 |
| MOL002663* | Skimmianin | 259.28 | 2.33 | 0 | 5 | 40.14 | 1.26 | 1.1 | 0.2 | 0.14 | -2.43 |
| MOL002666* | Chelerythrine | 332.37 | 4.29 | 0 | 4 | 34.18 | 1.24 | 0.28 | 0.78 | 0.36 | 6.32 |
| MOL000449* | Stigmasterol | 412.77 | 7.64 | 1 | 1 | 43.83 | 1.44 | 1 | 0.76 | 0.22 | 5.57 |
| MOL002668* | Worenine | 334.37 | 3.73 | 0 | 4 | 45.83 | 1.22 | 0.24 | 0.87 | 0.27 | 8.41 |
| MOL002670* | Cavidine | 353.45 | 3.72 | 0 | 5 | 35.64 | 1.08 | 0.63 | 0.81 | 0 | 5.78 |
| MOL000358* | Beta-sitosterol | 414.79 | 8.08 | 1 | 1 | 36.91 | 1.32 | 0.99 | 0.75 | 0.23 | 5.36 |
| MOL000622* | Magnograndiolide | 266.37 | 1.18 | 2 | 4 | 63.71 | 0.02 | -0.24 | 0.19 | 0.3 | 3.17 |
| MOL000785* | Palmatine | 352.44 | 3.65 | 0 | 4 | 64.6 | 1.33 | 0.37 | 0.65 | 0.13 | 2.25 |
| MOL000787* | Fumarine | 353.4 | 2.95 | 0 | 6 | 59.26 | 0.56 | -0.13 | 0.83 | 0.3 | 23.46 |
| MOL000790* | Isocorypalmine | 341.44 | 3.35 | 1 | 5 | 35.77 | 0.85 | 0.43 | 0.59 | 0.21 | 2.47 |
| MOL000098* | Quercetin | 302.25 | 1.5 | 5 | 7 | 46.43 | 0.05 | -0.77 | 0.28 | 0.38 | 14.4 |
| MOL001131* | Phellamurin_qt | 356.4 | 3.61 | 4 | 6 | 56.6 | 0.14 | -0.5 | 0.39 | 0.38 | 14.89 |
| MOL001455* | (S)-Canadine | 339.42 | 3.4 | 0 | 5 | 53.83 | 1.01 | 0.64 | 0.77 | 0.19 | 6.56 |
| MOL001771* | Poriferast-5-en-3beta-ol | 414.79 | 8.08 | 1 | 1 | 36.91 | 1.45 | 1.14 | 0.75 | 0 | 5.07 |
| MOL002894* | Berberrubine | 322.36 | 3.2 | 1 | 4 | 35.74 | 1.07 | 0.17 | 0.73 | 0.24 | 6.46 |
| MOL005438* | Campesterol | 400.76 | 7.63 | 1 | 1 | 37.58 | 1.34 | 0.95 | 0.71 | 0.22 | 4.83 |
| MOL006422* | Thalifendine | 322.36 | 3.2 | 1 | 4 | 44.41 | 1.12 | 0.21 | 0.73 | 0.22 | 5.99 |
| MOL000211# | Mairin | 456.78 | 6.52 | 2 | 3 | 55.38 | 0.73 | 0.22 | 0.78 | 0.26 | 8.87 |
| MOL000358# | Beta-sitosterol | 414.79 | 8.08 | 1 | 1 | 36.91 | 1.32 | 0.99 | 0.75 | 0.23 | 5.36 |
| MOL000422# | Kaempferol | 286.25 | 1.77 | 4 | 6 | 41.88 | 0.26 | -0.55 | 0.24 | 0 | 14.74 |
| MOL005399# | Alexandrin_qt | 414.79 | 8.08 | 1 | 1 | 36.91 | 1.3 | 0.88 | 0.75 | 0.23 | 5.53 |
| MOL005853# | Methyl-2,3,6-tri-O-Galloyl-beta-D-glucopyranoside | 654.68 | 0.46 | 0 | 16 | 44.95 | -0.84 | -1.22 | 0.67 | 0 | 6.77 |
| MOL005858# | 3,7,8-Tri-O-methylellagic acid | 344.29 | 2.24 | 1 | 8 | 37.54 | 0.22 | -0.78 | 0.57 | 0 | 0.18 |
| MOL005864# | Methyl-6-O-galloyl-β-D-glucopyranoside | 346.32 | -0.86 | 6 | 10 | 44.85 | -1.24 | -1.81 | 0.29 | 0 | 4.84 |
| MOL005869# | Daucostero_qt | 414.79 | 8.08 | 1 | 1 | 36.91 | 1.32 | 0.87 | 0.75 | 0 | 5.08 |
| MOL000098# | Quercetin | 302.25 | 1.5 | 5 | 7 | 46.43 | 0.05 | -0.77 | 0.28 | 0.38 | 14.4 |
| MOL011105@ | Indican | 295.32 | -0.05 | 5 | 6 | 34.9 | -0.66 | -1.23 | 0.23 | 0.24 | 0.08 |
| MOL011332@ | 10h-indolo,[3,2-b],quinoline | 218.27 | 3.94 | 1 | 1 | 54.57 | 1.52 | 1.02 | 0.22 | 0.33 | 10.81 |
| MOL011335@ | Isoindigo | 262.28 | 1.65 | 2 | 4 | 94.3 | 0.79 | 0.32 | 0.26 | 0.41 | 13.98 |
| MOL001781@ | Indigo | 262.28 | 2.11 | 2 | 4 | 38.2 | 0.83 | 0.02 | 0.26 | 0.44 | 77.01 |
| MOL001810@ | 6-(3-oxoindolin-2-ylidene)indolo[2,1-b]quinazolin-12-one | 363.39 | 3.54 | 1 | 5 | 45.28 | 1.19 | 0.48 | 0.89 | 0.44 | 47.91 |
| MOL002309@ | Indirubin | 262.28 | 1.88 | 2 | 4 | 48.59 | 1.06 | 0.44 | 0.26 | 0.44 | 44.44 |
| MOL000358@ | Beta-sitosterol | 414.79 | 8.08 | 1 | 1 | 36.91 | 1.32 | 0.99 | 0.75 | 0.23 | 5.36 |
| MOL002322@ | Isovitexin | 432.41 | -0.06 | 7 | 10 | 31.29 | -1.24 | -2.01 | 0.72 | 0.33 | 16.45 |

MW: molecular weights; AlogP:partition coefficient between octanol and water; Hdon: hydrogen bond donor; Hacc: hydrogen bond acceptor; OB: oral bioavailability; Caco-2: Caco-2 permeability; BBB: blood-brain barrier; DL: drug-likeness; FASA-: fractional negative accessible surface area; HL: drug half-life.*: 24 bioactive ingredients of HB; #: 9 bioactive ingredients of DY; @: 8bioactive ingredients of QD.
